# Supplementary material
Source: PubMed Central journal article supplement (PMC6526509)
Supplement: NIHMS1016563-supplement-Supplemental_Table_S2.pdf [file NIHMS1016563-supplement-Supplemental_Table_S2.pdf]

**Table S2. Representative CID analysis of Ric-8A to identify specific phosphorylation sites after tryptic digestion**

| Phospho-Site | Peptide                                               | # Peptide Hits |
|--------------|-------------------------------------------------------|----------------|
| S30          | (R)EHsQSFTFDDAQQEDR(K)                                | 65             |
| S32          | (R)EHSQsFTFDDAQQEDR(K)                                | 65             |
| S298         | (K)cLDVLLALELHEG <sub>s</sub> LEFMGVNMDVINALLAFLEK(R) | 19             |
| S435         | (R)GLMAGGRPEGQY <sub>s</sub> EDEDtDTEEYR(E)           | 35             |



otic digest and MS analysis.

| #Phos-site Hits | Representitive Fragmentation |            |                    |                |          |        |
|-----------------|------------------------------|------------|--------------------|----------------|----------|--------|
|                 | B-Ions                       | Y-Ions     | Total Peptide Mass | Predicted Mass | Differen |        |
| 4               | B2                           | 267.11 Y14 | 1,753.67           | 2018.76        | 1939.93  | 78.83  |
|                 | B3                           | 434.11 Y13 | 1,586.67           |                |          |        |
|                 |                              | Y12        | 1,458.61           |                |          |        |
|                 |                              | Y11        | 1,371.58           |                |          |        |
|                 |                              | Y10        | 1,224.51           |                |          |        |
|                 |                              | Y9         | 1,123.47           |                |          |        |
|                 |                              | Y8         | 976.4              |                |          |        |
|                 |                              | Y7         | 861.37             |                |          |        |
|                 |                              | Y6         | 746.34             |                |          |        |
|                 |                              | Y5         | 675.31             |                |          |        |
|                 |                              | Y4         | 547.25             |                |          |        |
|                 |                              | Y3         | 419.19             |                |          |        |
|                 |                              | Y2         | 290.15             |                |          |        |
|                 |                              | Y1         | 175.12             |                |          |        |
| 3               | B2                           | 267.1 Y14  | 1753.7             | 2018.76        | 1939.93  | 78.83  |
|                 | B3                           | 354.1 Y12  | 1538.6             |                |          |        |
|                 | B4                           | 482.2 Y11  | 1371.6             |                |          |        |
|                 | B9                           | 115.4 Y10  | 1224.5             |                |          |        |
|                 | B14                          | 1730.6 Y9  | 1123.5             |                |          |        |
|                 |                              | Y8         | 976.4              |                |          |        |
|                 |                              | Y7         | 861.4              |                |          |        |
|                 |                              | Y6         | 746.3              |                |          |        |
|                 |                              | Y5         | 675                |                |          |        |
|                 |                              | Y4         | 547.2              |                |          |        |
|                 |                              | Y3         | 419.2              |                |          |        |
|                 |                              | Y2         | 290.1              |                |          |        |
|                 |                              | Y1         | 175.1              |                |          |        |
|                 | 1                            | B2         | 274.1 Y14          |                |          |        |
| B3              |                              | 389.1 Y12  | 1345.8             |                |          |        |
| B4              |                              | 488.2 Y11  | 1230.7             |                |          |        |
| B5              |                              | 601.3 Y10  | 1131.7             |                |          |        |
| B9              |                              | 1027.5 Y9  | 1018.6             |                |          |        |
|                 |                              | Y8         | 904.6              |                |          |        |
|                 |                              | Y7         | 833.5              |                |          |        |
|                 |                              | Y6         | 720.4              |                |          |        |
|                 |                              | Y5         | 607.3              |                |          |        |
|                 |                              | Y4         | 536.3              |                |          |        |
|                 |                              | Y2         | 276.2              |                |          |        |
| 16              | B7                           | 643.3 Y15  | 1996.6             | 2864.81        | 2705.76  | 159.05 |
|                 | B8                           | 740.4 Y13  | 1811.6             |                |          |        |
|                 | B9                           | 869.4 Y12  | 1648.5             |                |          |        |
|                 | B10                          | 926.5 Y11  | 1481.5             |                |          |        |
|                 | B11                          | 1054.5 Y10 | 1352.5             |                |          |        |
|                 | B12                          | 1217.6 Y9  | 1237.4             |                |          |        |

|     |        |    |        |
|-----|--------|----|--------|
| B14 | 1513.6 | Y8 | 1108.4 |
| B15 | 1628.6 | Y7 | 993.4  |
| B16 | 1757.7 | Y6 | 812.3  |
| B17 | 1872.7 | Y5 | 697.3  |
|     |        | Y4 | 596.3  |
|     |        | Y3 | 467.2  |

---

|    |     |        |     |        |         |         |        |
|----|-----|--------|-----|--------|---------|---------|--------|
| 13 | B7  | 643.3  | Y15 | 1996.6 | 2864.81 | 2705.76 | 159.05 |
|    | B8  | 740.4  | Y13 | 1811.6 |         |         |        |
|    | B9  | 869.4  | Y12 | 1648.5 |         |         |        |
|    | B10 | 926.5  | Y11 | 1481.5 |         |         |        |
|    | B11 | 1054.5 | Y10 | 1352.5 |         |         |        |
|    | B12 | 1217.6 | Y9  | 1237.4 |         |         |        |
|    | B14 | 1513.6 | Y8  | 1108.4 |         |         |        |
|    | B15 | 1628.6 | Y7  | 993.4  |         |         |        |
|    | B16 | 1757.7 | Y6  | 812.3  |         |         |        |
|    | B17 | 1872.7 | Y5  | 697.3  |         |         |        |
|    |     |        | Y4  | 596.3  |         |         |        |
|    |     |        | Y3  | 467.2  |         |         |        |

ice

1 Phosphorylation (+80)

            
1 Phosphorylation (+80)

            
1 Phosphorylation (+80)  
1 Carbamidomethyl (+57)

            
2 Phosphorylation (+80)

---

2 Phosphorylation (+80)

**Table S2. Representative CID analysis of WT rat Ric-8A protein purified from *E. coli* and treated with Tryptic & Chymotryptic digestion**

| Phospho-Site | Peptide                   | # Peptide Hits |
|--------------|---------------------------|----------------|
| S435         | (R)PEGQYsEDEDtDTEEYREA(K) | 20             |
| T440         | (R)PEGQYsEDEDtDTEEYREA(K) | 20             |
| S522         | CETMEGQLssDPDsDPD         | 100            |
| S523         | CETMEGQLssDPDsDPD         | 100            |
| S527         | CETMEGQLssDPDsDPD         | 100            |





**n vitro with CK2.**

| #Phos-site Hits | Representitive Fragmentation |           |                    |                |        |       | Differen |
|-----------------|------------------------------|-----------|--------------------|----------------|--------|-------|----------|
|                 | B-Ions                       | Y-Ions    | Total Peptide Mass | Predicted Mass |        |       |          |
| 15              | B2                           | 227.1 Y10 | 1321.5             | 2549.9         | 2390.0 | 159.9 |          |
|                 | B3                           | 284.1 Y9  | 1140.5             |                |        |       |          |
|                 | B4                           | 412.2 Y8  | 1025.5             |                |        |       |          |
|                 | B5                           | 575.2 Y7  | 924.4              |                |        |       |          |
|                 | B8                           | 986.3 Y6  | 795.4              |                |        |       |          |
|                 | B9                           | 1115.4 Y5 | 666.4              |                |        |       |          |
|                 | B10                          | 1230.4 Y4 | 503.3              |                |        |       |          |
|                 |                              |           | Y3                 |                |        |       | 347.2    |
|                 |                              |           | Y2                 |                |        |       | 218.1    |
|                 |                              |           | Y1                 |                |        |       | 147.1    |
| 17              | B2                           | 227.1 Y10 | 1321.5             | 2549.9         | 2390.0 | 159.9 |          |
|                 | B3                           | 284.1 Y9  | 1140.5             |                |        |       |          |
|                 | B4                           | 412.2 Y8  | 1025.5             |                |        |       |          |
|                 | B5                           | 575.2 Y7  | 924.4              |                |        |       |          |
|                 | B8                           | 986.3 Y6  | 795.4              |                |        |       |          |
|                 | B9                           | 1115.4 Y5 | 666.4              |                |        |       |          |
|                 | B10                          | 1230.4 Y4 | 503.3              |                |        |       |          |
|                 |                              |           | Y3                 |                |        |       | 347.2    |
|                 |                              |           | Y2                 |                |        |       | 218.1    |
|                 |                              |           | Y1                 |                |        |       | 147.1    |
| 37              | B2                           | 290.1 Y7  | 840.2              | 2121.6         | 1824.7 | 296.9 |          |
|                 | B3                           | 391.1 Y6  | 725.2              |                |        |       |          |
|                 | B4                           | 522.2 Y3  | 346.1              |                |        |       |          |
|                 | B5                           | 651.2 Y2  | 231.1              |                |        |       |          |
|                 | B6                           | 708.2     |                    |                |        |       |          |
|                 | B7                           | 836.3     |                    |                |        |       |          |
|                 | B8                           | 949.4     |                    |                |        |       |          |
|                 | B11                          | 1398.4    |                    |                |        |       |          |
| 63              | B2                           | 290.1 Y7  | 840.2              | 2121.6         | 1824.7 | 296.9 |          |
|                 | B3                           | 391.1 Y6  | 725.2              |                |        |       |          |
|                 | B4                           | 522.2 Y3  | 346.1              |                |        |       |          |
|                 | B5                           | 651.2 Y2  | 231.1              |                |        |       |          |
|                 | B6                           | 708.2     |                    |                |        |       |          |
|                 | B7                           | 836.3     |                    |                |        |       |          |
|                 | B8                           | 949.4     |                    |                |        |       |          |
|                 | B11                          | 1398.4    |                    |                |        |       |          |
| 74              | B2                           | 290.1 Y7  | 840.2              | 2121.6         | 1824.7 | 296.9 |          |
|                 | B3                           | 391.1 Y6  | 725.2              |                |        |       |          |
|                 | B4                           | 522.2 Y3  | 346.1              |                |        |       |          |
|                 | B5                           | 651.2 Y2  | 231.1              |                |        |       |          |

|     |        |
|-----|--------|
| B6  | 708.2  |
| B7  | 836.3  |
| B8  | 949.4  |
| B11 | 1398.4 |

---

ice

2 Phosphorylation (+80)

---

2 Phosphorylation (+80)

---

3 Phosphorylation (+80)  
1 Carbamidomethyl (+57)

---

3 Phosphorylation (+80)  
1 Carbamidomethyl (+57)

---

3 Phosphorylation (+80)  
1 Carbamidomethyl (+57)
